# Supplementary material
Source: publisher site journal article supplement (https://www.spandidos-publications.com/8398/downloadSupplementary)

Figure S1. ROC curve analysis of CDX2 for OS and DFS. (A) AUC of CDX2 for OS is 0.75. (B) AUC of CDX2 for DFS is 0.72. ROC, receiver operating characteristic; AUC, area under the curve; CDX2, caudal-type homeobox 2; DFS, disease-free survival; OS, overall survival.

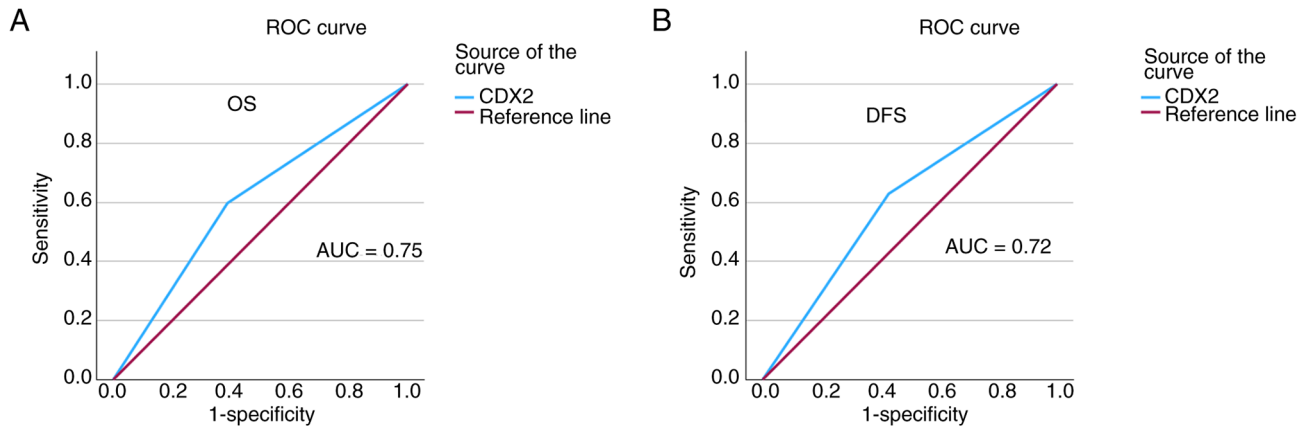

Supplement: Supplementary file 1 [file downloadSupplementary]
